# Supplementary material for: Carbon nanodots revised: the thermal citric acid/urea reaction
Source: PubMed Central journal article supplement (PMC8163031; doi:10.1039/d0sc01605e), 2020-07-17
Supplement: SC-011-D0SC01605E-s001.pdf [file SC-011-D0SC01605E-s001.pdf]

## Supporting Information to

Volker Strauss<sup>1\*</sup>, Huize Wang<sup>1</sup>, Simon Delacroix<sup>1</sup>, Marc Ledendecker<sup>2</sup>, Pablo Wessig<sup>3</sup>

|                                                                            |    |
|----------------------------------------------------------------------------|----|
| Synthesis .....                                                            | 24 |
| Nuclear Magnetic Resonance Spectroscopy of the Raw Products .....          | 24 |
| UV-vis and Fluorescence Spectroscopy of the Raw Products.....              | 25 |
| Nuclear Magnetic Resonance Spectroscopy of the Educts and References ..... | 26 |
| Separation of the Raw Products.....                                        | 27 |
| Extinction coefficients of CUg .....                                       | 27 |
| Time-correlated Single-Photon Counting of CUg and CUB.....                 | 28 |
| Fluorescence Quantum Yields of CUg .....                                   | 28 |
| Photostability of CUg .....                                                | 29 |
| ESI - mass spectrometry of CUg and CUB.....                                | 29 |
| 2D-Correlation NMR of CUg.....                                             | 30 |
| DFT calculations of CUg (HPPT).....                                        | 31 |
| 2D-Correlation NMR of CUB.....                                             | 32 |
| Nuclear Magnetic Resonance Spectroscopy of Biuret.....                     | 33 |
| Biuret test with CUB .....                                                 | 33 |
| Thermal Mass analysis of CUg and CUB .....                                 | 34 |
| Thermogravimetric Analysis of the Raw Mixture .....                        | 34 |
| X-ray Photoelectron Spectroscopy of CUB and CUg .....                      | 35 |
| Nuclear Magnetic Resonance Spectroscopy during Washing of CUp .....        | 35 |
| Optical Spectroscopy of dispersions of CUp in H <sub>2</sub> O.....        | 36 |
| Nuclear Magnetic Resonance Spectroscopy of a Non-Separated Mixture .....   | 36 |

## Synthesis

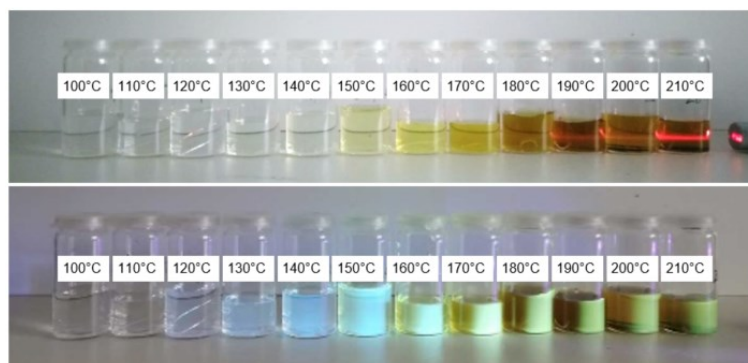

**Figure S1.** Photograph of aqueous sample solutions of the crude products (conc: 0.2 mg/mL) synthesized at temperatures between 100 – 220°C under illumination with a red laser (top) and under illumination with a UV-lamp (365 nm) (bottom).

## Nuclear Magnetic Resonance Spectroscopy of the Raw Products

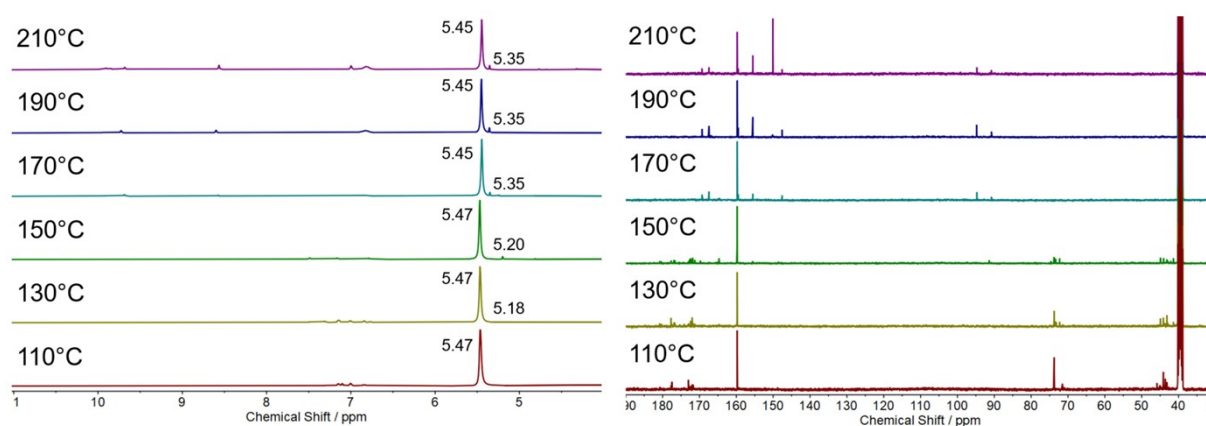

**Figure S2.** <sup>1</sup>H-NMR (left) and <sup>13</sup>C-NMR (right) spectra of selected raw products of the CA/U reaction at different temperatures between 110-210°C.

## UV-vis and Fluorescence Spectroscopy of the Raw Products

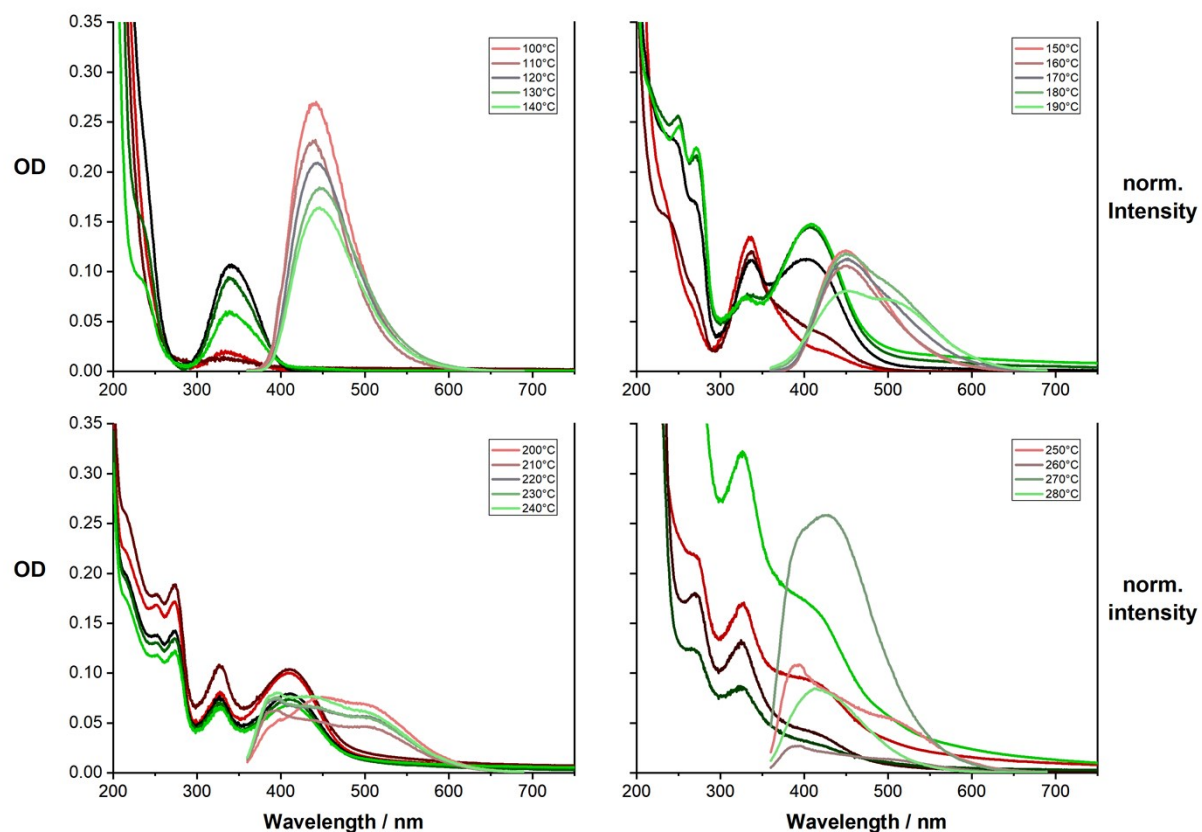

**Figure S3.** Combined electronic absorption (red to green) and excitation normalized ( $\lambda_{\text{ex}} = 350 \text{ nm}$ ) emission (pale red to pale green) spectra of crude CA/U products (0.013 mg/mL) synthesized at different temperatures between 100 – 290°C; a) 100 – 140°C; b) 150 – 190°C; a) 200 – 240°C; a) 250 – 290°C.

## Nuclear Magnetic Resonance Spectroscopy of the Educts and References

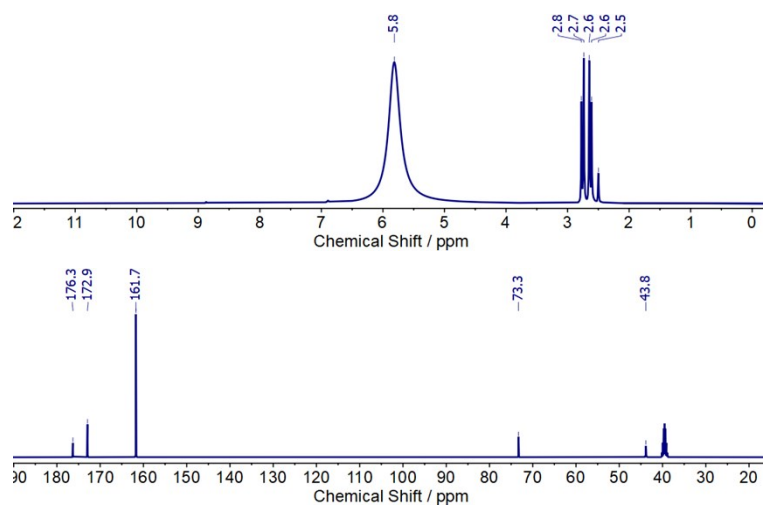

**Figure S4.** Top: <sup>1</sup>H-NMR (top) and <sup>13</sup>C-NMR (bottom) spectra of *citric acid* and *urea* in DMSO-d<sub>6</sub>.

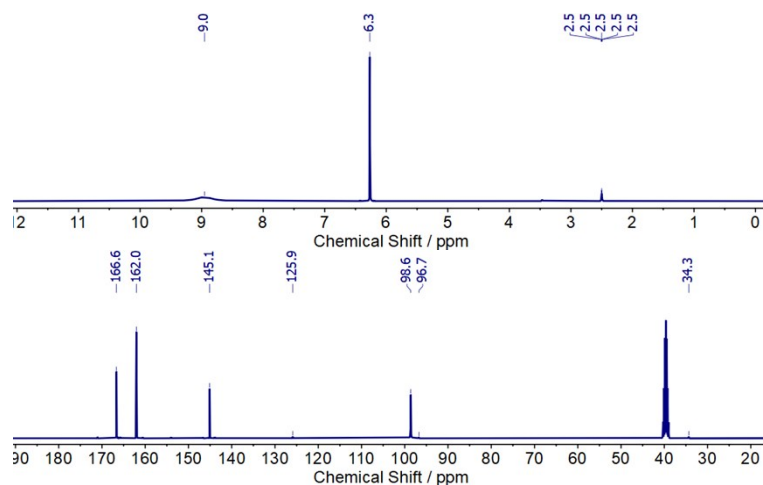

**Figure S5.** Top: <sup>1</sup>H-NMR (top) and <sup>13</sup>C-NMR (bottom) spectra of *citrazinic acid* (commercial) in DMSO-d<sub>6</sub>.

## Separation of the Raw Products

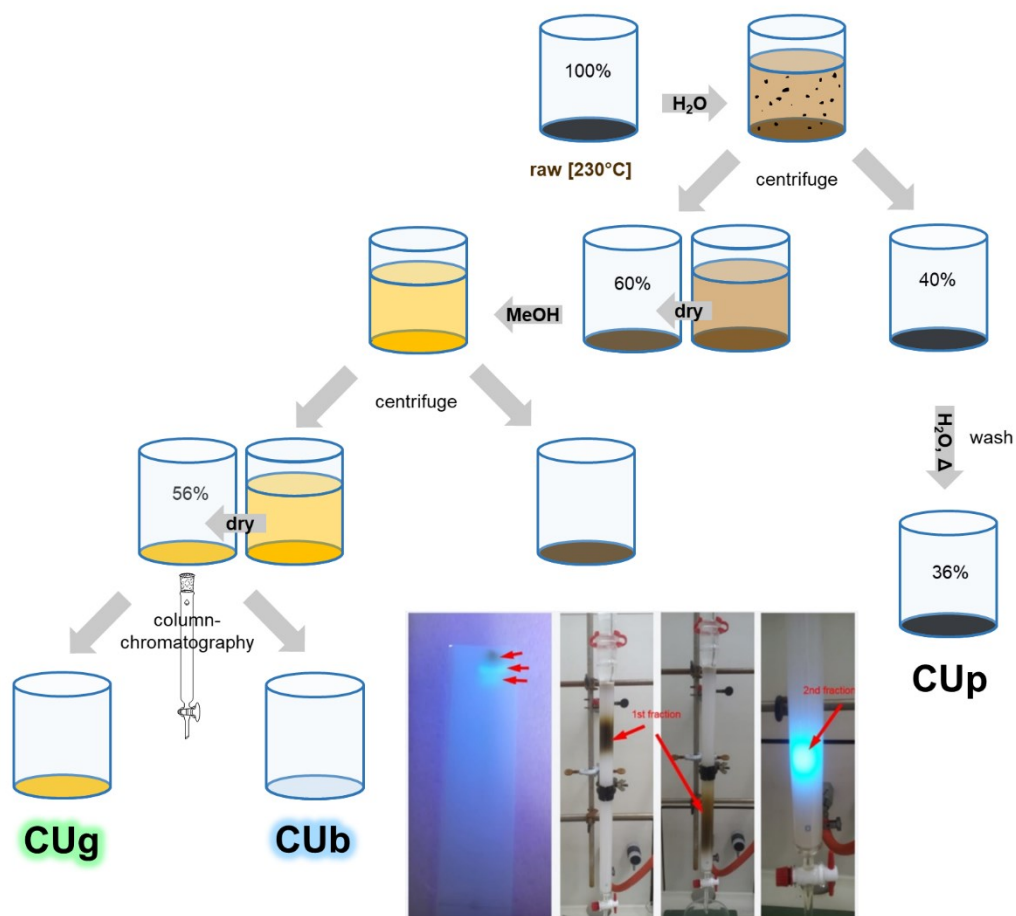

Figure S6. Illustration of the separation process of the raw products obtained from a thermal CA/U reaction.

## Extinction coefficients of CUg

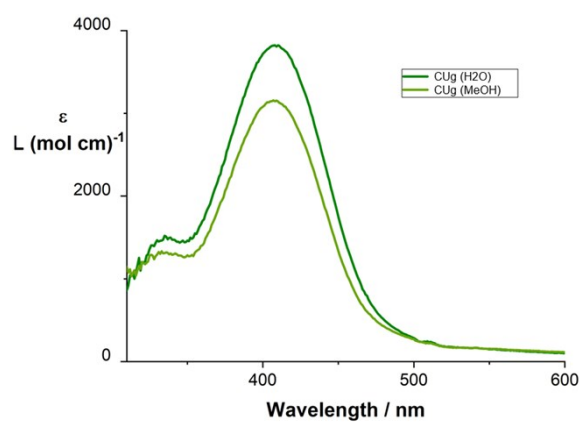

Figure S7. Molar extinction coefficients of CUg in H<sub>2</sub>O and MeOH.

## Time-correlated Single-Photon Counting of CUb and CUg

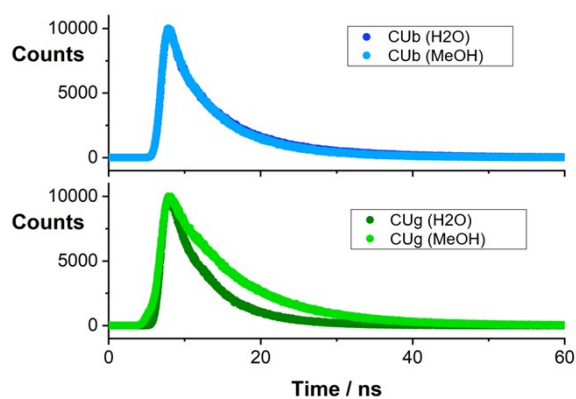

**Figure S8.** Fluorescence lifetime decay profiles obtained by TCSPC of CUb and CUg in H<sub>2</sub>O and MeOH at room temperature obtained upon excitation at 370 or 450 nm, respectively .

**Table S1.** Fluorescence lifetimes of CUb and CUg in MeOH and H<sub>2</sub>O.

|     |                  | $\tau_1$ | $A_1$ | $\tau_2$ | $A_2$ |
|-----|------------------|----------|-------|----------|-------|
|     |                  | ns       | %     | ns       | %     |
| CUb | MeOH             | 3.1      | 28    | 7.6      | 72    |
|     | H <sub>2</sub> O | 4.1      | 45    | 9.5      | 55    |
| CUg | MeOH             | 9.0      | 100   |          |       |
|     | H <sub>2</sub> O | 5.3      | 100   |          |       |

## Fluorescence Quantum Yields of CUg

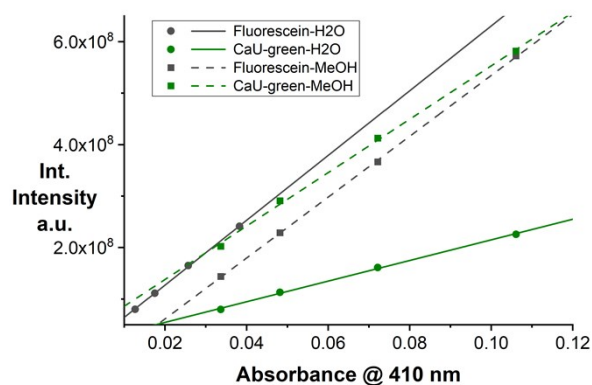

**Figure S9.** Determination of the fluorescence quantum yields of CUg in H<sub>2</sub>O and MeOH using Na-fluorescein as a standard.

**Table S2.** Fluorescence quantum yields of **CUg** determined by the gradient method using Na-fluorescein as a standard and in MeOH and H<sub>2</sub>O.

|                | solvent          | slope    | $\Phi_{Fl}$ (%)  |
|----------------|------------------|----------|------------------|
| Na-Fluorescein | H <sub>2</sub> O | 6.30E+09 | 85 <sup>64</sup> |
|                | MeOH             | 5.90E+09 | 79               |
| <b>CUg</b>     | H <sub>2</sub> O | 2.00E+09 | 27               |
|                | MeOH             | 5.20E+09 | 70               |

## Photostability of CUg

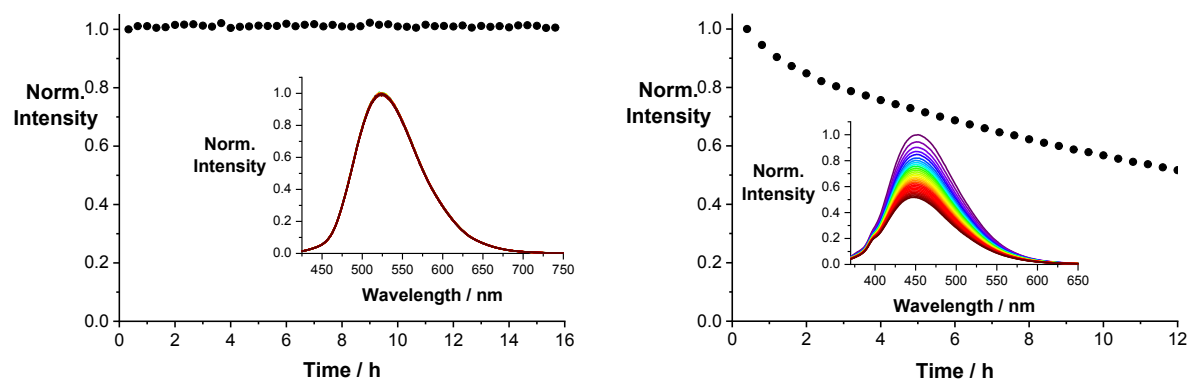

**Figure S10.** Left: photo-stability measurement of a  $8.3 \times 10^{-5}$  M solution of **CUg** in H<sub>2</sub>O. The sample was constantly illuminated for 16h. The inset shows the fluorescence spectra in time intervals of 20 min; Right: Photo-stability measurement of **CUb** in H<sub>2</sub>O. The inset shows the fluorescence spectra in time intervals of 24 min from purple to red.

## ESI - mass spectrometry of CUg and CUb

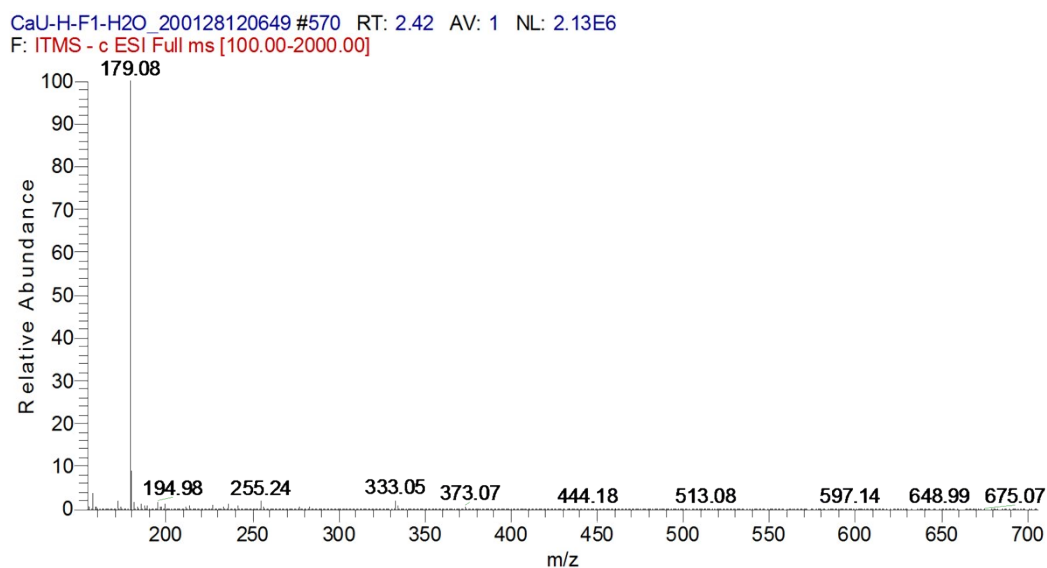

**Figure S11.** Liquid chromatography-electrospray ionization - mass spectrum of **CUg** obtained in negative ion mode.

CaU-H-F2-H2O\_200128131350 #513 RT: 2.18 AV: 1 NL: 7.24E5  
 F: ITMS + c ESI Full ms [100.00-2000.00]

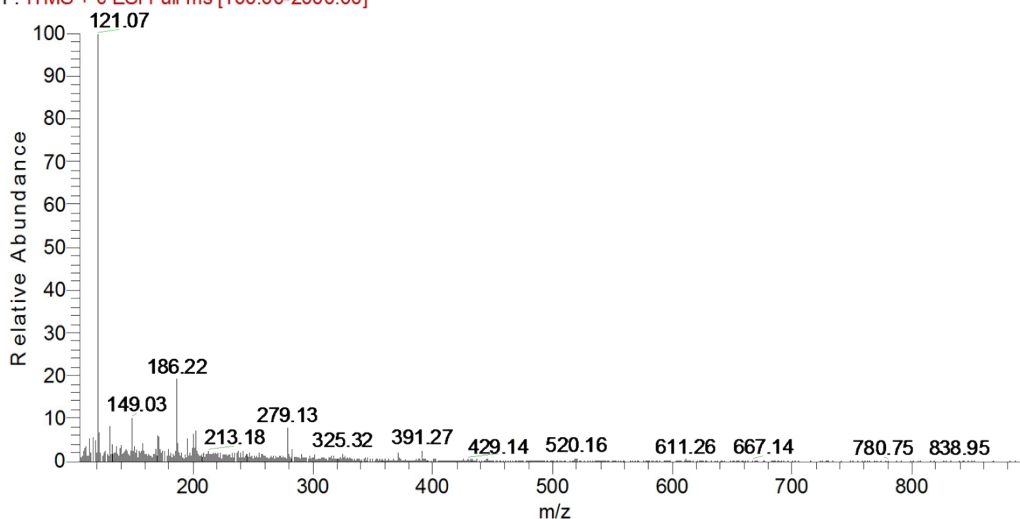

**Figure S12.** Liquid chromatography – electrospray ionization - mass spectrum of **CUb** obtained in positive ion mode.

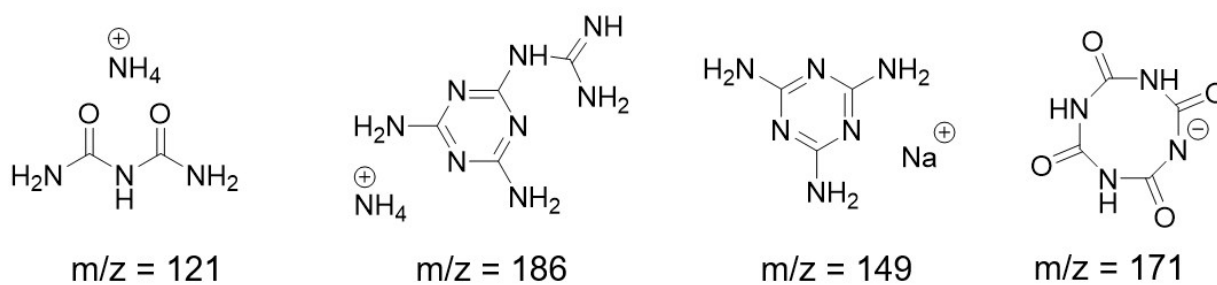

**Figure S13.** Potential compounds detected in the ESI-mass spectra of **CUb**.

## 2D-Correlation NMR of **CUg**

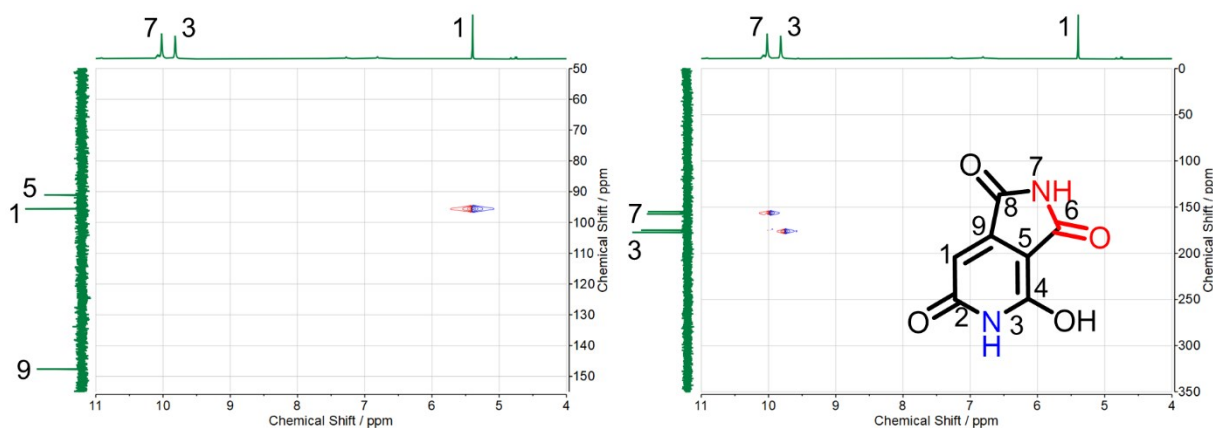

**Figure S14.** HSQC-C (left) and HSQC-N (right) of **CUg** in DMSO- $d_6$  showing the direct coupling of  $^1\text{H}$  to  $^{13}\text{C}$  or  $^{15}\text{N}$ , respectively.



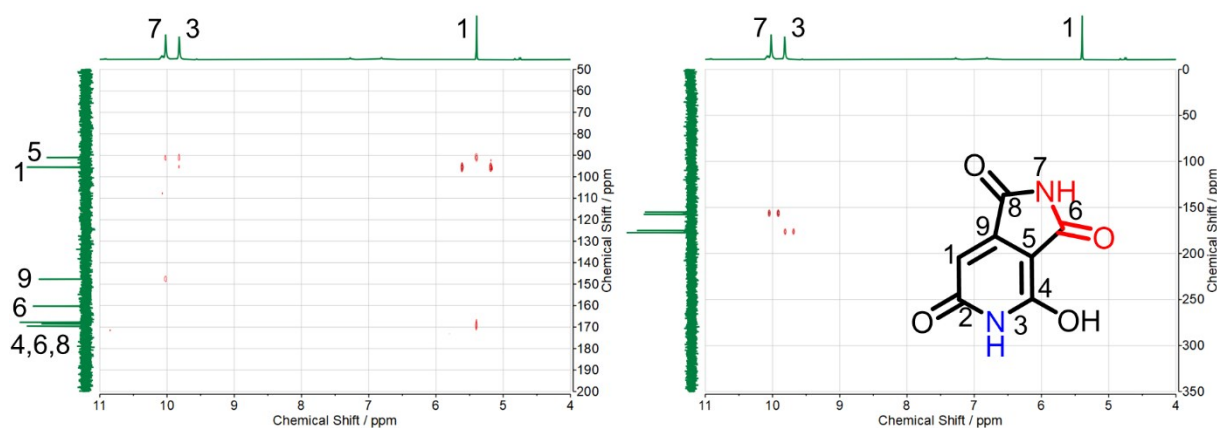

**Figure S15.** HMBC-C (left) and HMBC-N (right) **CUg** enriched with  $^{15}\text{N}$  in  $\text{DMSO-d}_6$  showing the three-bond coupling of  $^1\text{H}$  to  $^{13}\text{C}$  or  $^{15}\text{N}$ , respectively.

### DFT calculations of CUg (HPPT)

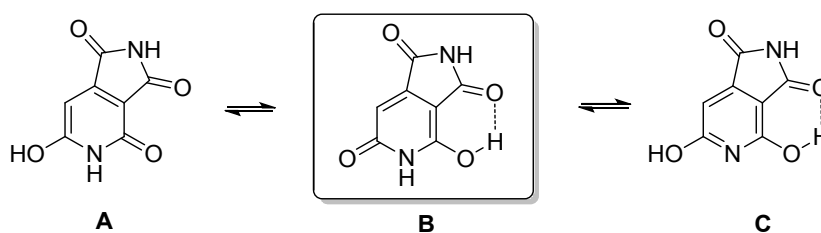

**Figure S16.** Molecular structures of the tautomeric forms of HPPT.

**Table S3.** DFT calculated tautomeric forms of HPPT with relative energy values in arbitrary units using M06-2X-D3/def2-TZVP, SCRF: PCM.

| Geometry (vacuum) | Geometry (MeOH) | Geometry ( $\text{H}_2\text{O}$ ) | $E_{\text{REL}}$ (vac.) | $E_{\text{REL}}$ (MeOH) | $E_{\text{REL}}$ ( $\text{H}_2\text{O}$ ) |
|-------------------|-----------------|-----------------------------------|-------------------------|-------------------------|-------------------------------------------|
|                   |                 |                                   | +10.9                   | + 4.4                   | + 4.2                                     |

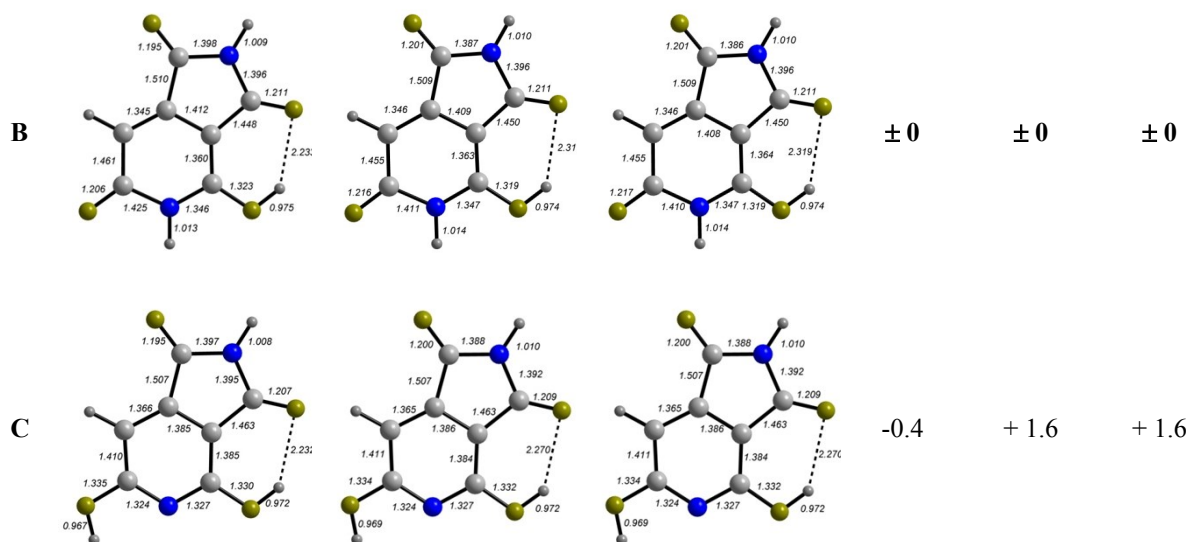

## 2D-Correlation NMR of CUB

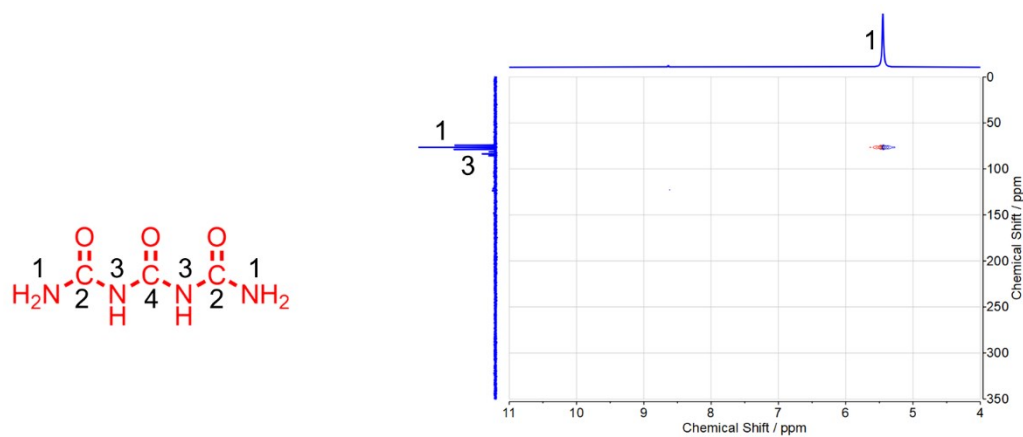

**Figure S17.** HSQC-N of CUB enriched with  $^{15}\text{N}$  in DMSO- $d_6$  showing the direct coupling of  $^1\text{H}$  to  $^{13}\text{C}$  or  $^{15}\text{N}$ , respectively.

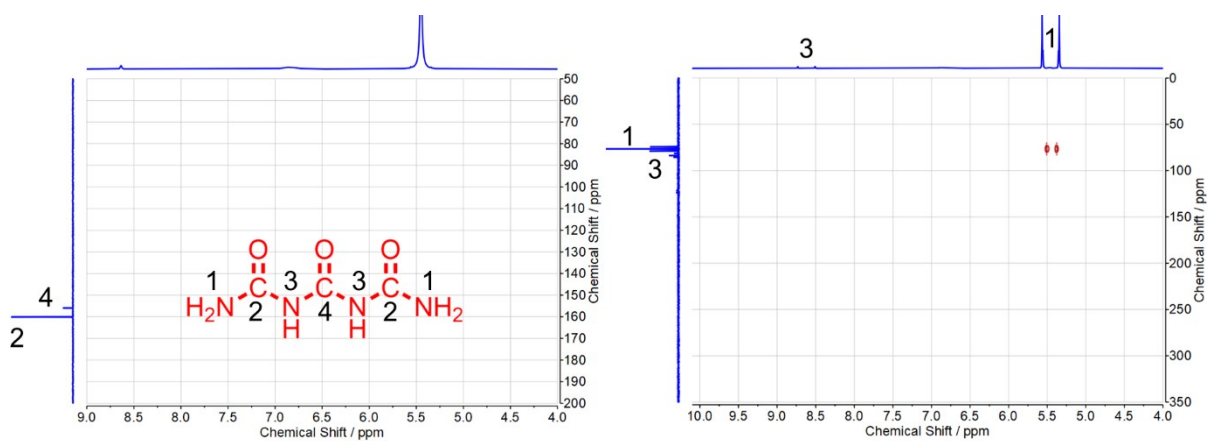

**Figure S18.** HMBC-C (left) and HMBC-N (right) of **CUB** enriched with  $^{15}\text{N}$  in  $\text{DMSO-d}_6$  showing the three-bond coupling of  $^1\text{H}$  to  $^{13}\text{C}$  or  $^{15}\text{N}$ , respectively.

## Nuclear Magnetic Resonance Spectroscopy of Biuret

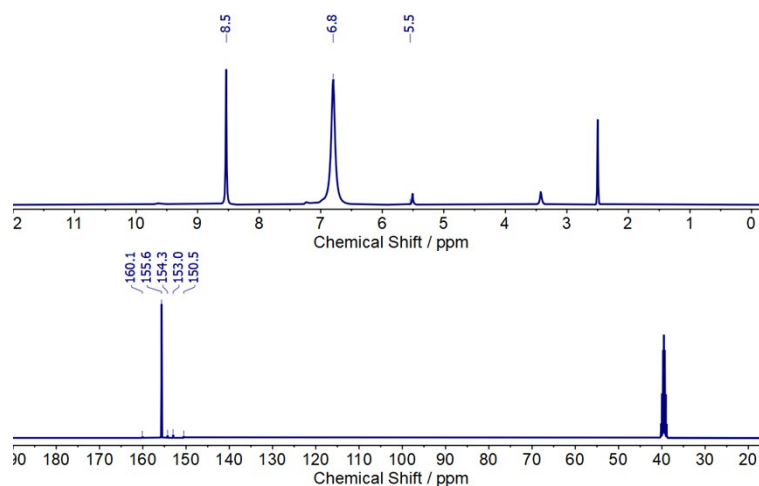

**Figure S19.** Top:  $^1\text{H}$ -NMR (top) and  $^{13}\text{C}$ -NMR (bottom) spectra of **biuret** (commercial) in  $\text{DMSO-d}_6$ .

## Biuret test with **CUB**

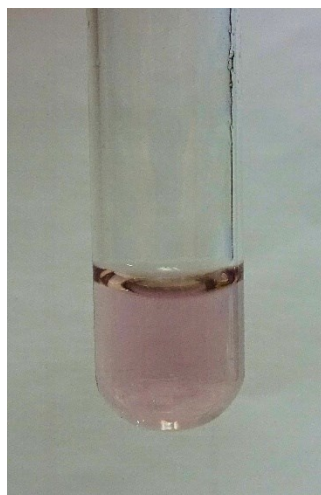

**Figure S20.** Photograph of a basic solution of **CUB** upon addition of a  $\text{CuSO}_4$  solution.

## Thermal Mass analysis of CUG and CUB

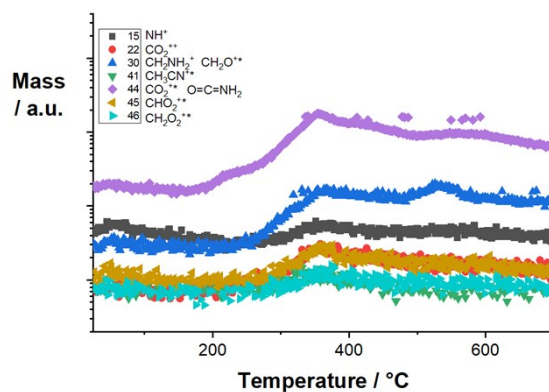

Figure S21. Temperature dependent mass spectrometric analysis of CUG.

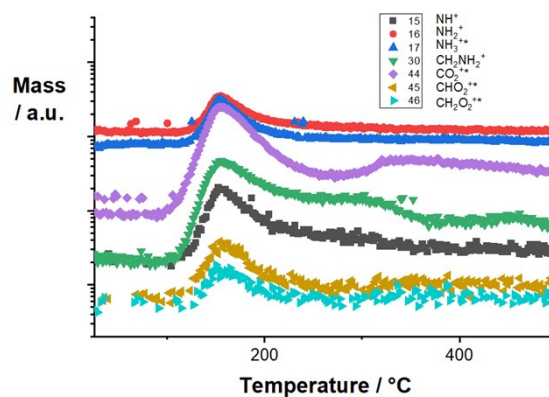

Figure S22. Temperature dependent mass spectrometric analysis of CUB.

## Thermogravimetric Analysis of the Raw Mixture

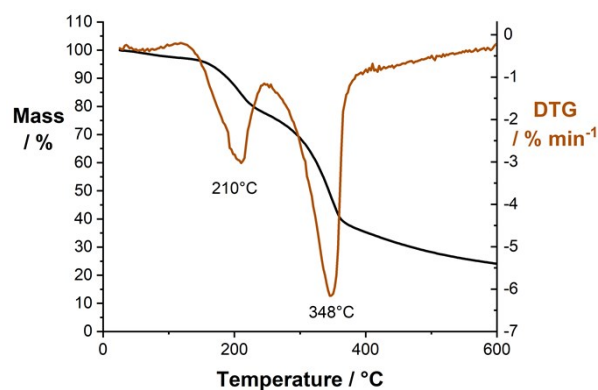

Figure S23. Thermogravimetric analysis of the supernatant of the raw product before column chromatography containing CUG and CUB.

## X-ray Photoelectron Spectroscopy of CUB and CUG

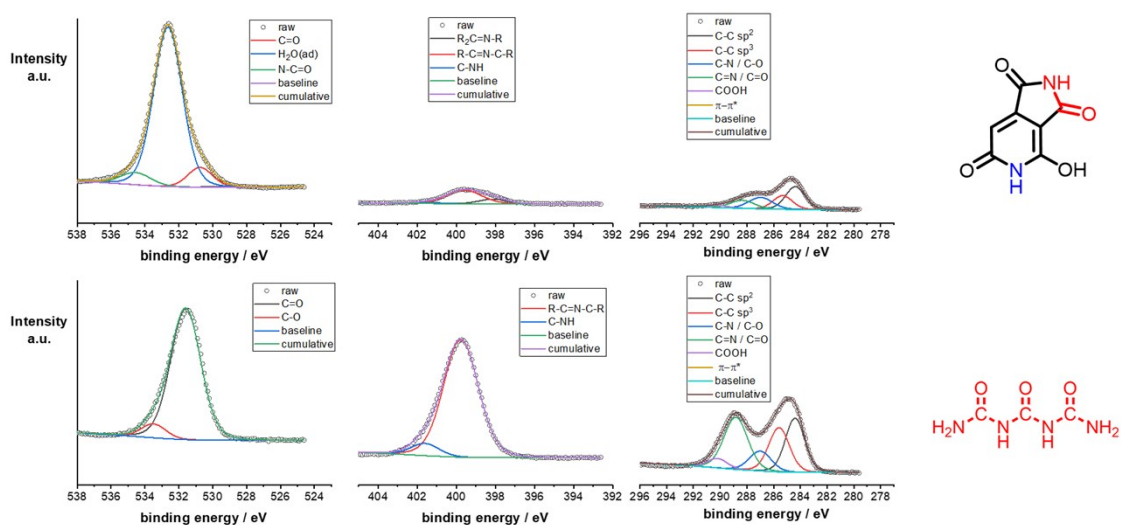

**Figure S24.** X-ray photoelectron spectra of CUG (top) and CUB (bottom) with emphasis on the C<sub>1s</sub>, N<sub>1s</sub>, and O<sub>1s</sub> regions.

## Nuclear Magnetic Resonance Spectroscopy during Washing of CUP

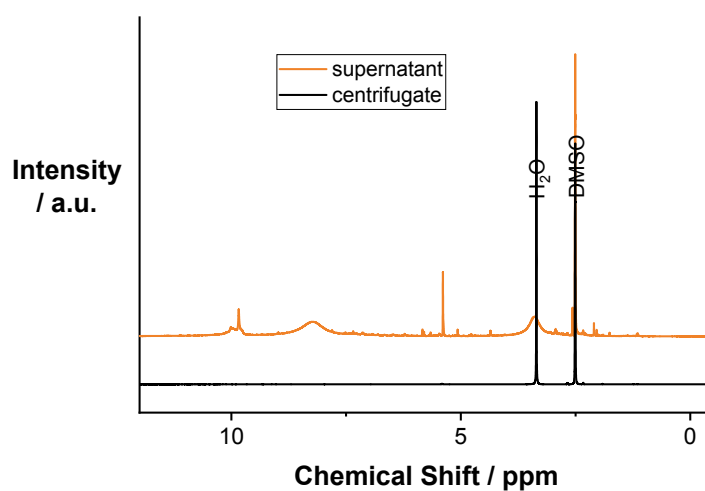

**Figure S25.** <sup>1</sup>H-NMR spectra of the supernatant and the redispersed centrifugate after washing CUP in H<sub>2</sub>O at 95°C in DMSO-d<sub>6</sub>.

## Optical Spectroscopy of dispersions of CUp in H<sub>2</sub>O.

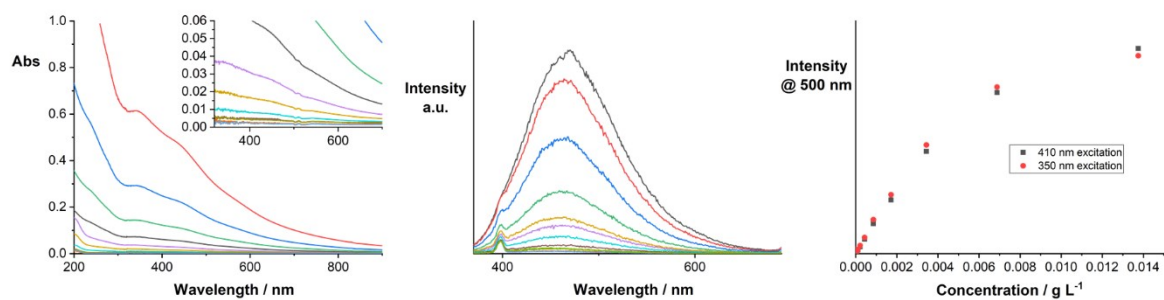

**Figure S26.** Absorption (left) and fluorescence (center) spectra of CUp in H<sub>2</sub>O at room temperature at different concentrations. Right: Fluorescence intensity versus concentration of CUp in H<sub>2</sub>O.

## Nuclear Magnetic Resonance Spectroscopy of a Non-Separated Mixture

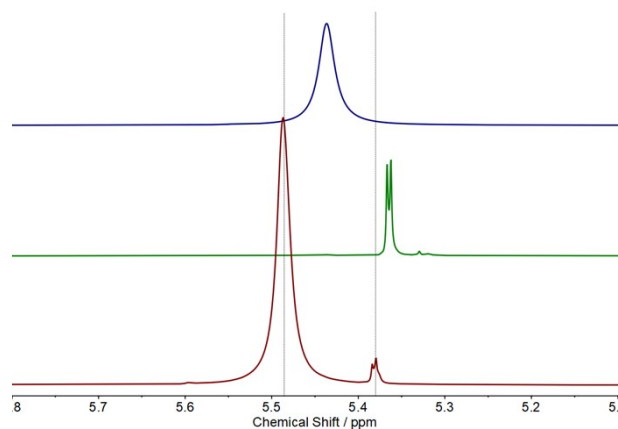

**Figure S27.** <sup>1</sup>H-NMR spectra of CUb (top), CUg (center) and the non-separated mixture of CUb and CUg (bottom) in DMSO-*d*<sub>6</sub>.

## References (continued from paper)

64. X.-F. Zhang, J. Zhang and L. Liu, Fluorescence Properties of Twenty Fluorescein Derivatives: Lifetime, Quantum Yield, Absorption and Emission Spectra, *J. Fluoresc.*, 2014, **24** (3), 819–826, 10.1007/s10895-014-1356-5
